# Supplementary material for: Emodin, an Emerging Mycotoxin, Induces Endoplasmic Reticulum Stress-Related Hepatotoxicity through IRE1α–XBP1 Axis in HepG2 Cells
Source: MDPI journal article supplement (doi:10.3390/toxins15070455), 2023-07-12
Supplement: s1 [file s1]

# Supplementary Materials: Emodin, an Emerging Mycotoxin, Induces Endoplasmic Reticulum Stress-Related Hepatotoxicity through IRE1 $\alpha$ -XBP1 Axis in HepG2 Cells

Su Been Park, Gun Hee Cho, Young Eun Park and Hyang Sook Chun

Table S1. List of primers used in qPCR

| Gene              | GenBank Accession number | Primer sequence                                               | Product size (base pair) | Annealing temperatures of the primers |
|-------------------|--------------------------|---------------------------------------------------------------|--------------------------|---------------------------------------|
| BiP<br>(GRP78)    | X87949                   | 5'-GGTGACCTGGTACTGCTTGATG-3'<br>5'-CCTTGGATTTCAGTTTGGTCATG-3' | 84bp                     | 60 °C                                 |
| CHOP<br>(GADD153) | S40706                   | 5'-CTTGGCTGACTGAGGAGGAG-3'<br>5'-TCACCATTCCGGTCAATCAGA-3'     | 312bp                    | 60 °C                                 |
| sXBP1             | NM_001394000             | 5'-CTGAGTCCGAATCAGGTGCAG -3'<br>5'-ATCCATGGGGAGATGTTCTGG-3'   | 59bp                     | 60 °C                                 |
| IRE1              | AF059198                 | 5'-CTCAGAGACAGCGCGAGTAG-3'<br>5'-ATCTCAGCCTAGCTGTCCCA-3'      | 155bp                    | 60 °C                                 |
| $\beta$ -actin    | HQ154074                 | 5'-TCATCACCATTGGCAATGAG -3'<br>5'-CACTGTGTTGGCGTACAGGT-3'     | 154bp                    | 60 °C                                 |

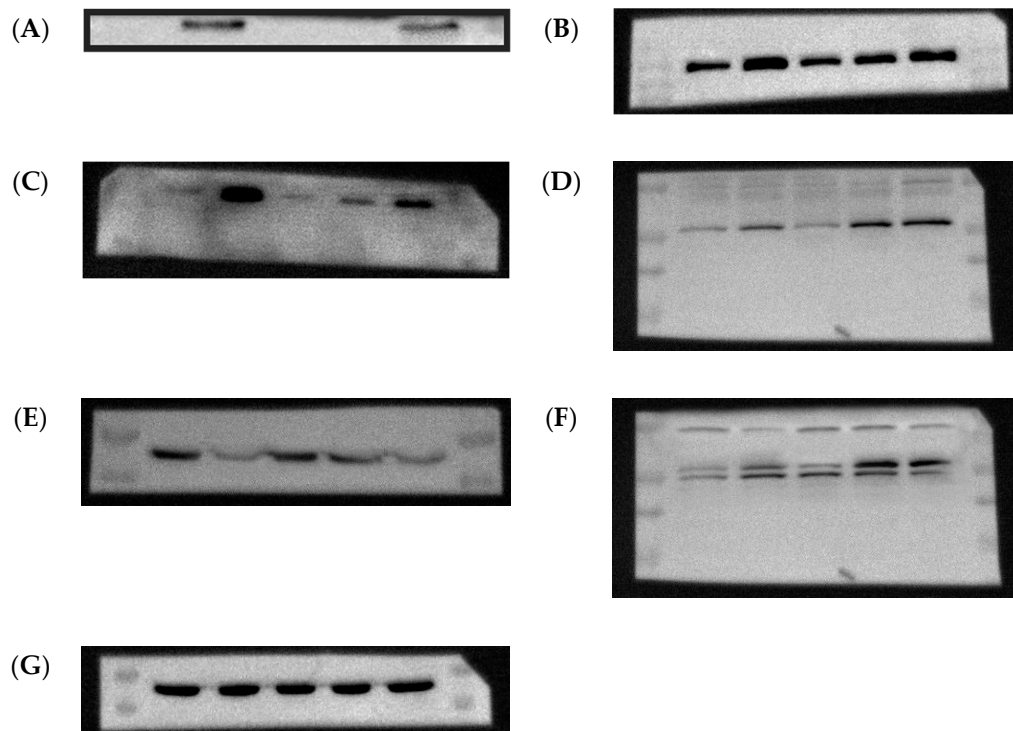

Figure S1. Original images of blot membranes in Figure 5(A). (A) Bip, (B) IRE1 $\alpha$ , (C) CHOP, (D) Bax, (E) Bcl-2, (F) Cleaved caspase-3 and (G)  $\beta$ -actin.

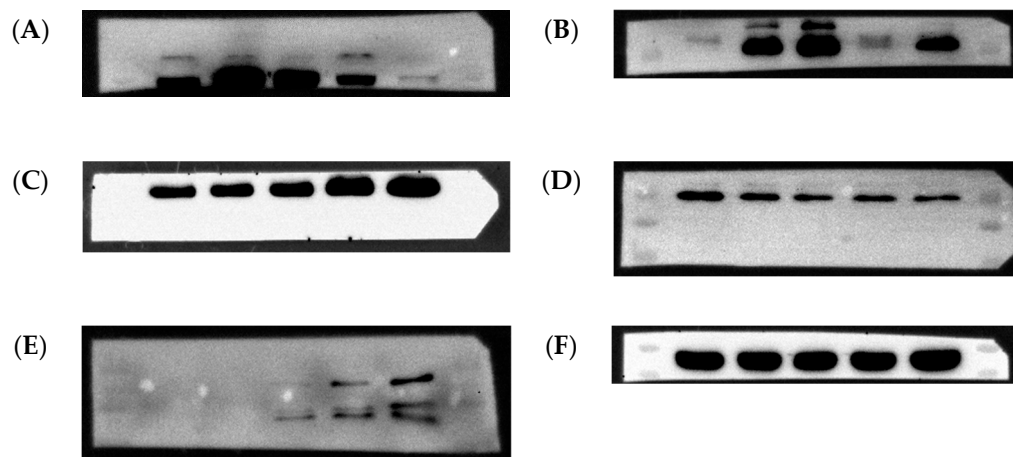

Figure S2. Original images of blot membranes in Figure 7(A). (A) Bip, (B) CHOP, (C) Bax, (D) Bcl-2, (E) Cleaved caspase-3 and (F)  $\beta$ -actin.

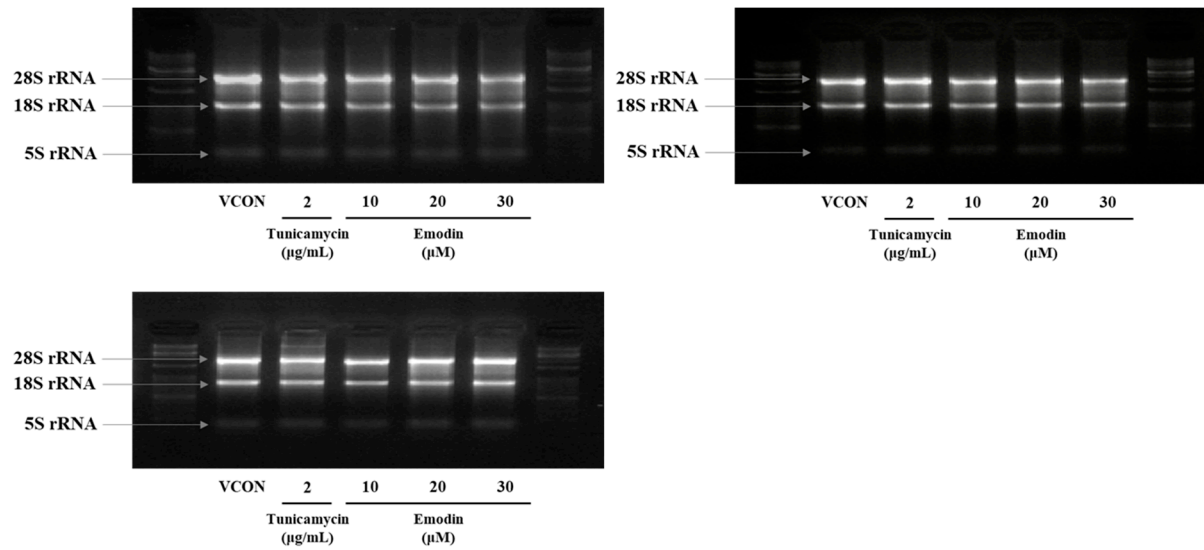

Figure S3. Agarose gel electrophoresis of all RNA samples used in qPCR analysis.

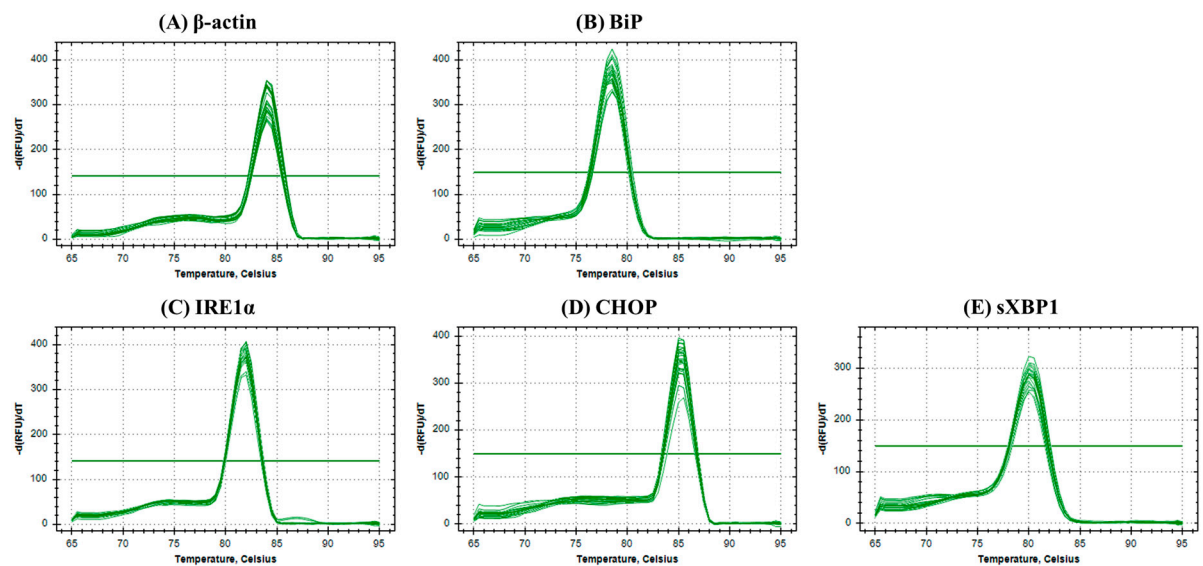

Figure S4. Melting curves of qPCR amplification. (A)  $\beta$ -actin, (B) BiP, (C) IRE1 $\alpha$ , (D) CHOP and (E) sXBP1.
